# Supplementary material
Source: Springer Nature journal article supplement (https://www.springermedizin.de/resource/supplementary/12885_2009_1881_MOESM2_ESM.pdf/9461476)

**CD4/CD8 – day 10**

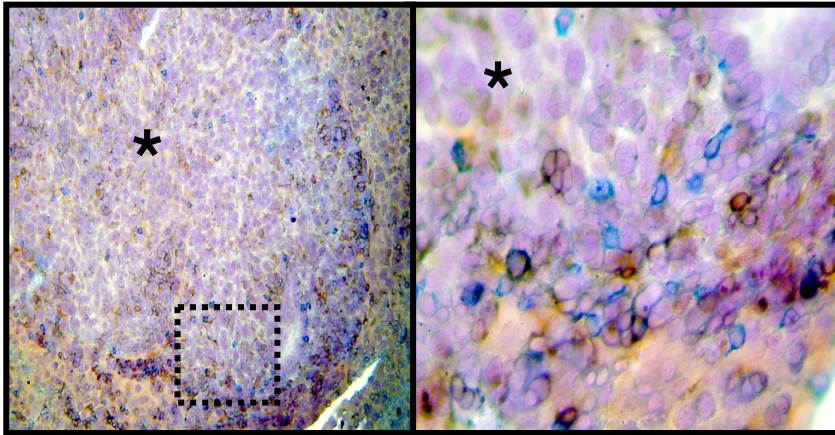

**CD4/CD8 – day 20**

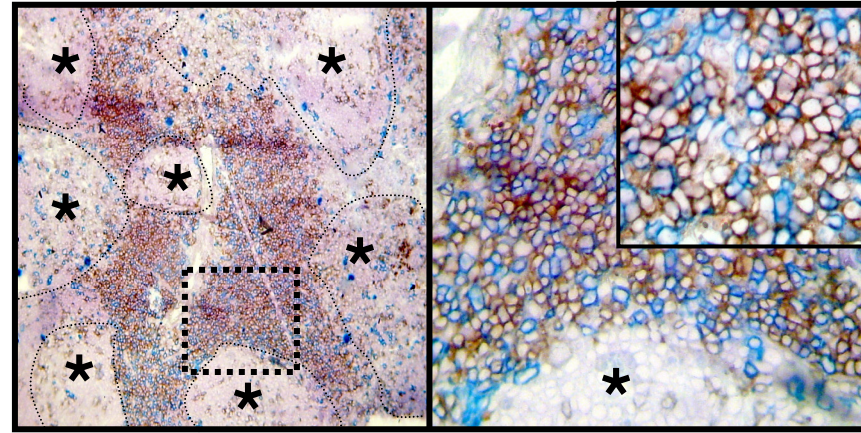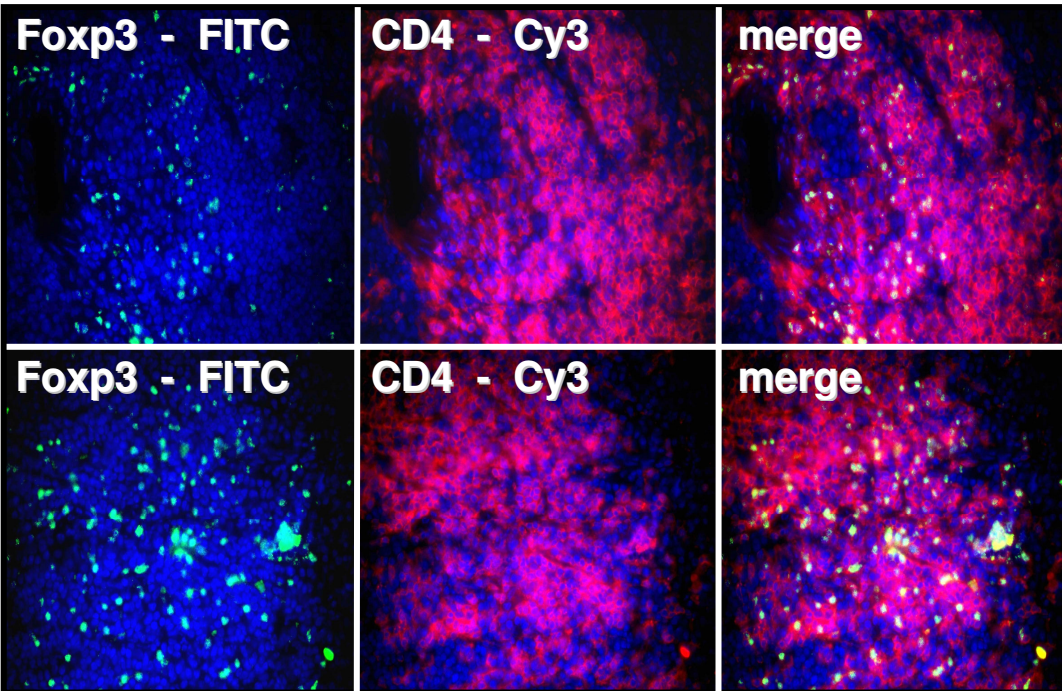

**Foxp3/CD4  
day 10**

**Foxp3/CD4  
day 20**

Supplement: MOESM2 [file 9461476]
